# Supplementary material for: Hepatoprotective effects of wine-steamed Schisandra sphenanthera fruit in alleviating APAP-induced liver injury via the gut–liver axis
Source: Royal Society of Chemistry journal article supplement (doi:10.1039/d5fo00656b), 2025-01-01
Supplement: d5fo00656b1.pdf [file d5fo00656b1.pdf]

## Supplementary File S1

### *S2.1.1 Using response surface method (RSM) to optimize the extraction of SFE*

It is generally known that the extraction yield of target analytes is affected by multiple parameters, including the interactions of various factors in the extraction process. Based on various single-factor assays shown in [Figure S1](#), four single factors (steaming time, moistening time, quantity of wine addition, and drying time) were selected. To ascertain the optimum conditions for the extraction of SFE, the Box–Behnken experiment was designed with four factors and three levels, using Design-Expert (DE) 8.0.6.1 software. Experimental factors and level design are shown in [Table S1](#). To determine the impact of various factors and their interactions on the extraction process, the data were fitted with multiple regression software to obtain the following quadratic multiple regression equation:  $Y = 0.45 + 3.109E-003A + 5.053E-004B + 0.017C + 6.929E-003D - 2.785E-004AB - 3.982E-003AC - 0.011AD + 3.031E-003BC - 4.136E-003BD - 8.327E-003CD - 0.029A^2 - 0.016B^2 - 0.038C^2 - 5.880E-003D^2$ . In the equation,  $Y$  was the content of schisantherin A; and  $A$ ,  $B$ ,  $C$ , and  $D$  were the concentration of steaming time ( $A$ ), moistening time ( $B$ ), quantity of wine addition ( $C$ ), and drying time ( $D$ ), respectively.

The analysis of variance for the fitted quadratic polynomial model for optimization of extraction parameters was presented in [Table S2](#). The  $P$ -value for the model was  $P < 0.0001$ , which indicated that the model was feasible. With very small  $P$ -values ( $P < 0.001$ ), the results revealed that  $C$ ,  $A^2$ ,  $B^2$ , and  $C^2$  were significantly correlated with the content of schisantherin A. The “lack of fit” was not significant relative to the pure error ( $P > 0.05$ ), suggesting that this model could be used to predict the outcome of the experiment. By comparing the  $F$ -value and  $P$ -value, it was found that the effect size of a single factor on the content of schisantherin A was  $C > D > A > B$  (Quantity of wine addition > Drying time > Steaming time > Moistening time).

The 3D response surfaces were shown in [Figures S2 and S3](#), which showed the interactions of the

four independent variables and the effect on extraction yield. Using Design-Expert 12 software, combined with the regression model and interaction graphs to analyze the data further to obtain the optimal conditions for the extraction of schisantherin A: content of schisantherin A 0.455 %, steaming 2.94 h, moistening 1.98 h, 31.7 % of wine addition, and 50 °C drying for 4.53 h. To facilitate the operation, the final process conditions were determined: steaming for 3 h, smothering for 2 h, 32 % wine addition, and 50 °C drying for 4.5 h. Three parallel experiments were carried out, and the actual ester-metal yield was  $0.455 \pm 0.003$  %, which was close to the predicted value of the model, indicating that the prediction of this model was reliable and of great significance for the actual production.

**Table S1**

The optimization design and result of response surface analysis experiments of wine-steamed from the fruit of *S. sphenanthera*.

| No. | A<br>Steaming time<br>(h) | B<br>Moistening time<br>(h) | C<br>Quantity of wine<br>addition (g) | D<br>Drying time<br>(h) | Content of<br>schisantherin A (%) |
|-----|---------------------------|-----------------------------|---------------------------------------|-------------------------|-----------------------------------|
| 1   | 2                         | 1.5                         | 3                                     | 4                       | 0.406251                          |
| 2   | 4                         | 1.5                         | 3                                     | 4                       | 0.407442                          |
| 3   | 2                         | 2.5                         | 3                                     | 4                       | 0.409379                          |
| 4   | 4                         | 2.5                         | 3                                     | 4                       | 0.409456                          |
| 5   | 3                         | 2                           | 2                                     | 3                       | 0.375371                          |
| 6   | 3                         | 2                           | 4                                     | 3                       | 0.422105                          |
| 7   | 3                         | 2                           | 2                                     | 5                       | 0.411659                          |
| 8   | 3                         | 2                           | 4                                     | 5                       | 0.425086                          |
| 9   | 2                         | 2                           | 3                                     | 3                       | 0.393113                          |
| 10  | 4                         | 2                           | 3                                     | 3                       | 0.432452                          |
| 11  | 2                         | 2                           | 3                                     | 5                       | 0.426446                          |
| 12  | 4                         | 2                           | 3                                     | 5                       | 0.422707                          |
| 13  | 3                         | 1.5                         | 2                                     | 4                       | 0.379393                          |
| 14  | 3                         | 2.5                         | 2                                     | 4                       | 0.376472                          |
| 15  | 3                         | 1.5                         | 4                                     | 4                       | 0.41513                           |
| 16  | 3                         | 2.5                         | 4                                     | 4                       | 0.424333                          |
| 17  | 2                         | 2                           | 2                                     | 4                       | 0.363125                          |
| 18  | 4                         | 2                           | 2                                     | 4                       | 0.371309                          |
| 19  | 2                         | 2                           | 4                                     | 4                       | 0.403468                          |
| 20  | 4                         | 2                           | 4                                     | 4                       | 0.395723                          |
| 21  | 3                         | 1.5                         | 3                                     | 3                       | 0.42072                           |
| 22  | 3                         | 2.5                         | 3                                     | 3                       | 0.426312                          |
| 23  | 3                         | 1.5                         | 3                                     | 5                       | 0.439137                          |
| 24  | 3                         | 2.5                         | 3                                     | 5                       | 0.428185                          |
| 25  | 3                         | 2                           | 3                                     | 4                       | 0.453358                          |

**Table S2**Variance analysis table of the regression equation for the wine-steamed from the fruit of *S. sphenanthera*.

| Source         | Sum of squares | Degree of freedom | Mean       | F value    | P value  | Significance |
|----------------|----------------|-------------------|------------|------------|----------|--------------|
| model          | 0.018          | 14                | 1.306E-003 | 41.86      | < 0.0001 | **           |
| A              | 1.160E-004     | 1                 | 1.160E-004 | 3.72       | 0.0744   |              |
| B              | 3.064E-006     | 1                 | 3.064E-006 | 0.098      | 0.7586   |              |
| C              | 3.623E-003     | 1                 | 3.623E-003 | 116.09     | < 0.0001 | **           |
| D              | 5.761E-004     | 1                 | 5.761E-004 | 18.46      | 0.0007   | *            |
| AB             | 3.102E-007     | 1                 | 3.102E-007 | 9.941E-003 | 0.9220   |              |
| AC             | 6.343E-005     | 1                 | 6.343E-005 | 2.03       | 0.1759   |              |
| AD             | 4.639E-004     | 1                 | 4.639E-004 | 14.86      | 0.0017   | *            |
| BC             | 3.675E-005     | 1                 | 3.675E-005 | 1.18       | 0.2962   |              |
| BD             | 6.843E-005     | 1                 | 6.843E-005 | 2.19       | 0.1608   |              |
| CD             | 2.773E-004     | 1                 | 2.773E-004 | 8.89       | 0.0099   | *            |
| A <sup>2</sup> | 5.337E-003     | 1                 | 5.337E-003 | 170.99     | < 0.0001 | **           |
| B <sup>2</sup> | 1.664E-003     | 1                 | 1.664E-003 | 53.31      | < 0.0001 | **           |
| C <sup>2</sup> | 9.562E-003     | 1                 | 9.562E-003 | 306.39     | < 0.0001 | **           |
| D <sup>2</sup> | 2.243E-004     | 1                 | 2.243E-004 | 7.19       | 0.0179   | *            |
| Residual       | 4.369E-004     | 14                | 3.121E-005 |            |          |              |
| Lack of fit    | 3.859E-004     | 10                | 3.859E-005 | 3.02       | 0.1490   | -            |
| Pure error     | 5.108E-005     | 4                 | 1.277E-005 |            |          |              |
| Cor total      | 0.019          | 28                |            |            |          |              |

Note: "\*\*\*" means extremely significant ( $P < 0.01$ ); "\*" means significant ( $P < 0.05$ ); "-" means not significant

**Table S3**

Quantitative real-time PCR primer sequence.

| Genes           | Base sequences                                           |
|-----------------|----------------------------------------------------------|
| <i>β-actin</i>  | F: CTACCTCATGAAGATCCTGACC<br>R: CACAGCTTCTCTTTGATGTCAC   |
| <i>Mapk3</i>    | F: AGTCTCTGCCCTCGAAAACCA<br>R: CTCCTCTACTGTGATGCGCTTG    |
| <i>Mtor</i>     | F: CAAGGCCGAATCGTCTCCA<br>R: ATTTCAACAATCGGAGGCAACAA     |
| <i>Hsp90aa1</i> | F: TAACTCCGCCTTTGTGGAACGTC<br>R: AAATTCCTTCAGCTGTTGCACAC |
| <i>Casp3</i>    | F: TCTGACTGGAAAGCCGAAACT<br>R: GTCCCACTGTCTGTCTCAATGC    |
| <i>Stat3</i>    | F: ACGAAAGTCAGGTTGCTGGT<br>R: TGTGTTCTGTGCCCAGAATGT      |
| <i>Jun</i>      | F: ACGACCTTCTACGACGATGC<br>R: GCCAGGTTCAAGGTCATGCT       |
| <i>Hif1a</i>    | F: GGACGATGAACATCAAGTCAGCA<br>R: AGGAATGGGTTCAAAATCAGCA  |
| <i>Egfr</i>     | F: TGAGTTCTCTGAGTGCAACTAG<br>R: GAATGCGTCATCTATGTTGTCC   |
| <i>Src</i>      | F: CTATGTGGAGCGGATGAACTAT<br>R: ATTCGTTGTCTTCTATGAGCCG   |
| <i>IL-6</i>     | F: CTAGTGCGTTATGCCTAAGC<br>R: ATAGTGTCCTAACATTCATATTGTC  |
| <i>TNF-α</i>    | F: CGCCTTGGATTGACAAAC<br>R: CCTTCCGTGTTCTACCC            |

**Table S4**

Bioactive components of SFE.

| Name             | Formula                                         | Type   | Name                      | Formula                                                       | Type            |
|------------------|-------------------------------------------------|--------|---------------------------|---------------------------------------------------------------|-----------------|
| (-)-Gomisin L1   | C <sub>22</sub> H <sub>28</sub> O <sub>6</sub>  | Lignan | Kadangustin C             | C <sub>28</sub> H <sub>34</sub> O <sub>9</sub>                | Lignan          |
| Gomisin M2       | C <sub>28</sub> H <sub>38</sub> O <sub>7</sub>  | Lignan | Tigloylgomisin P          | C <sub>31</sub> H <sub>38</sub> O <sub>9</sub>                | Lignan          |
| Binankadsurin A  | C <sub>24</sub> H <sub>32</sub> O <sub>8</sub>  | Lignan | Schisandrer B             | C <sub>22</sub> H <sub>28</sub> O <sub>6</sub>                | Lignan          |
| Gomisin H        | C <sub>30</sub> H <sub>32</sub> O <sub>9</sub>  | Lignan | (+)-Anwulignan            | C <sub>20</sub> H <sub>20</sub> O <sub>6</sub>                | Lignan          |
| Gomisin S        | C <sub>28</sub> H <sub>36</sub> O <sub>9</sub>  | Lignan | Benzoylgomisin O          | C <sub>34</sub> H <sub>34</sub> O <sub>10</sub>               | Lignan          |
| Gomisin T        | C <sub>28</sub> H <sub>38</sub> O <sub>8</sub>  | Lignan | Patchouli alcohol         | C <sub>15</sub> H <sub>26</sub> O                             | Terpenoid       |
| Schisandrin B    | C <sub>24</sub> H <sub>32</sub> O <sub>7</sub>  | Lignan | Aristolochic acid         | C <sub>17</sub> H <sub>11</sub> NO <sub>7</sub>               | Terpenoid       |
| Schisandrone     | C <sub>20</sub> H <sub>24</sub> O <sub>5</sub>  | Lignan | Phytolaccagenin           | C <sub>30</sub> H <sub>46</sub> O <sub>6</sub>                | Terpenoid       |
| Heteroclitin B   | C <sub>28</sub> H <sub>34</sub> O <sub>8</sub>  | Lignan | Glycyrrhetic acid         | C <sub>30</sub> H <sub>46</sub> O <sub>4</sub>                | Triterpenoid    |
| Heteroclitin C   | C <sub>29</sub> H <sub>34</sub> O <sub>9</sub>  | Lignan | Neokadsuranic acid C      | C <sub>23</sub> H <sub>30</sub> O <sub>4</sub>                | Triterpenoid    |
| Schizandrol A    | C <sub>24</sub> H <sub>32</sub> O <sub>6</sub>  | Lignan | Ganoderic acid A          | C <sub>30</sub> H <sub>46</sub> O <sub>7</sub>                | Triterpenoid    |
| Myrislignan      | C <sub>20</sub> H <sub>22</sub> O <sub>6</sub>  | Lignan | Tripterine                | C <sub>30</sub> H <sub>46</sub> O <sub>4</sub>                | Triterpenoid    |
| Schisantherin O  | C <sub>23</sub> H <sub>28</sub> O <sub>9</sub>  | Lignan | Ursolic acid              | C <sub>30</sub> H <sub>48</sub> O <sub>3</sub>                | Triterpenoid    |
| Schizandrol B    | C <sub>24</sub> H <sub>32</sub> O <sub>6</sub>  | Lignan | Qingyangshengenin         | C <sub>22</sub> H <sub>30</sub> O <sub>4</sub>                | Triterpenoid    |
| Gomisin O        | C <sub>28</sub> H <sub>34</sub> O <sub>8</sub>  | Lignan | $\beta$ -chamigrenic acid | C <sub>30</sub> H <sub>48</sub> O <sub>3</sub>                | Sesquiterpenoid |
| Schisandrin C    | C <sub>23</sub> H <sub>30</sub> O <sub>7</sub>  | Lignan | Curcumol                  | C <sub>15</sub> H <sub>22</sub> O <sub>3</sub>                | Sesquiterpenoid |
| Gomisin J        | C <sub>29</sub> H <sub>32</sub> O <sub>9</sub>  | Lignan | Isolancilactone           | C <sub>20</sub> H <sub>26</sub> O <sub>5</sub>                | Sesquiterpenoid |
| Schisandrin A    | C <sub>24</sub> H <sub>32</sub> O <sub>7</sub>  | Lignan | Quercetin                 | C <sub>15</sub> H <sub>10</sub> O <sub>7</sub>                | Flavonoid       |
| Gomisin E        | C <sub>28</sub> H <sub>32</sub> O <sub>9</sub>  | Lignan | Scutellarein              | C <sub>15</sub> H <sub>10</sub> O <sub>6</sub>                | Flavonoid       |
| Heteroclitin D   | C <sub>28</sub> H <sub>36</sub> O <sub>9</sub>  | Lignan | Isorhamnetin              | C <sub>16</sub> H <sub>12</sub> O <sub>7</sub>                | Flavonoid       |
| Pregomisin       | C <sub>22</sub> H <sub>26</sub> O <sub>6</sub>  | Lignan | Diosmetin                 | C <sub>16</sub> H <sub>12</sub> O <sub>6</sub>                | Flavonoid       |
| Gomisin R        | C <sub>28</sub> H <sub>34</sub> O <sub>9</sub>  | Lignan | Eupatilin                 | C <sub>18</sub> H <sub>16</sub> O <sub>7</sub>                | Flavonoid       |
| Tigloylgomisin H | C <sub>31</sub> H <sub>38</sub> O <sub>9</sub>  | Lignan | Icarrin                   | C <sub>33</sub> H <sub>40</sub> O <sub>15</sub>               | Flavonoid       |
| Gomisin F        | C <sub>28</sub> H <sub>32</sub> O <sub>8</sub>  | Lignan | Neferine                  | C <sub>39</sub> H <sub>42</sub> N <sub>2</sub> O <sub>6</sub> | Alkaloid        |
| Heteroclitin A   | C <sub>28</sub> H <sub>36</sub> O <sub>9</sub>  | Lignan | L-Malic acid              | C <sub>4</sub> H <sub>6</sub> O <sub>5</sub>                  | Organic acid    |
| Benzoylgomisin H | C <sub>35</sub> H <sub>38</sub> O <sub>9</sub>  | Lignan | Citric acid               | C <sub>6</sub> H <sub>8</sub> O <sub>7</sub>                  | Organic acid    |
| Lancilactone A   | C <sub>22</sub> H <sub>28</sub> O <sub>4</sub>  | Lignan | 3,4-Dihydroxybenzoic acid | C <sub>7</sub> H <sub>6</sub> O <sub>4</sub>                  | Phenolic acid   |
| Lancilactone B   | C <sub>22</sub> H <sub>28</sub> O <sub>5</sub>  | Lignan | Cinnamic acid             | C <sub>9</sub> H <sub>8</sub> O <sub>2</sub>                  | Phenolic acid   |
| Schisantherin A  | C <sub>30</sub> H <sub>36</sub> O <sub>11</sub> | Lignan | Isoleucine                | C <sub>6</sub> H <sub>13</sub> NO <sub>2</sub>                | Amino acid      |
| Gomisin G        | C <sub>30</sub> H <sub>32</sub> O <sub>9</sub>  | Lignan | Phenylalanine             | C <sub>9</sub> H <sub>11</sub> NO <sub>2</sub>                | Amino acid      |
| Schisanthenol    | C <sub>23</sub> H <sub>28</sub> O <sub>4</sub>  | Lignan | Linoleic acid             | C <sub>18</sub> H <sub>32</sub> O <sub>2</sub>                | Fatty acid      |
| Schisantherin D  | C <sub>23</sub> H <sub>28</sub> O <sub>4</sub>  | Lignan |                           |                                                               |                 |

**Table S5**

Molecular docking binding energy between six key components and six proteins.

| Targets | Compound name    | Vina score |
|---------|------------------|------------|
| AKT     | Gomisin S        | -7.9       |
| JAK     | Gomisin F        | -7.4       |
| JAK     | Schisandrol B    | -7.7       |
| JAK     | Gomisin S        | -7.2       |
| JAK     | Tigloylgomisin P | -8.6       |
| JAK     | Schisantherin D  | -8.4       |
| JAK     | (+)-Anwulignan   | -8.8       |
| SYK     | Gomisin F        | -5.7       |
| SYK     | Schisandrol B    | -5.5       |
| SYK     | Gomisin S        | -6.2       |
| SYK     | Tigloylgomisin P | -6.1       |
| SYK     | Schisantherin D  | -7.3       |
| GSK3    | Schisandrol B    | -5.5       |
| GSK3    | Gomisin S        | -5.7       |
| GSK3    | Tigloylgomisin P | -6         |
| GSK3    | Schisantherin D  | -7.2       |
| MDM2    | Schisantherin D  | -7.9       |
| CCND1   | (+)-Anwulignan   | -6.7       |
| CCND1   | schisandrol B    | -7.8       |
| CCND1   | Gomisin S        | -6.3       |
| CCND1   | Tigloylgomisin P | -6.2       |

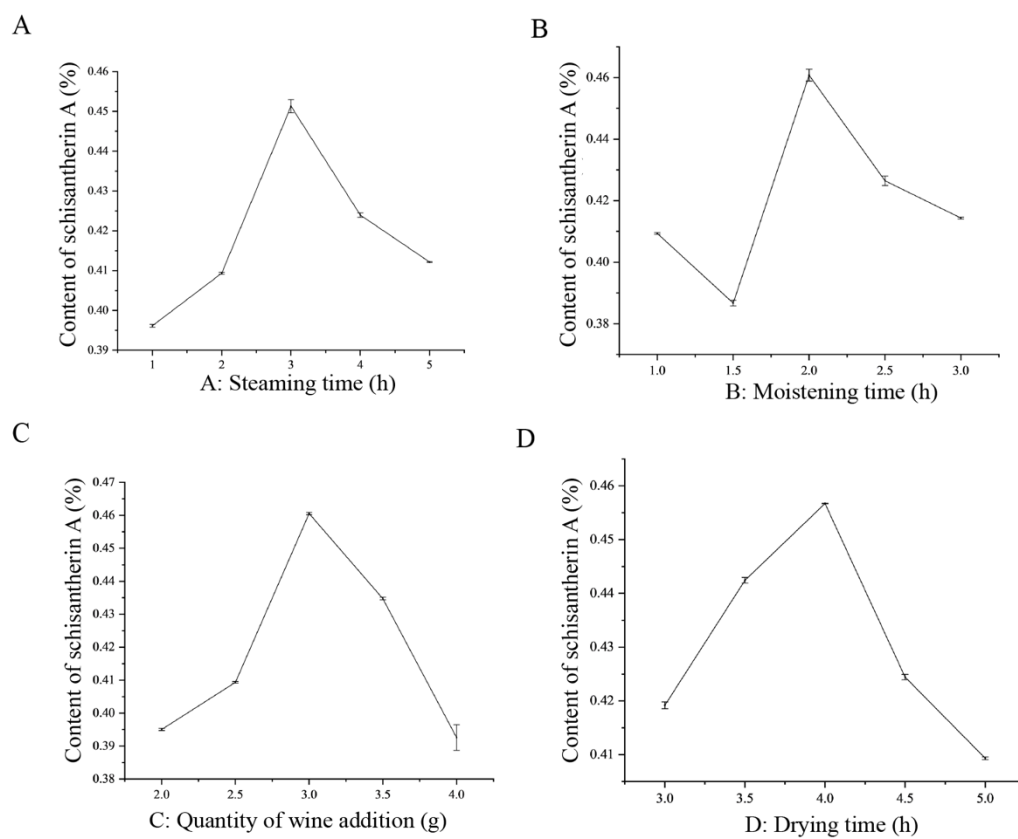

**Fig. S1.** Content of schisantherin A affected by (A) Steaming time (h); (B) Moistening time (h); (C) Quantity of wine addition (g); (D) Drying time (h).



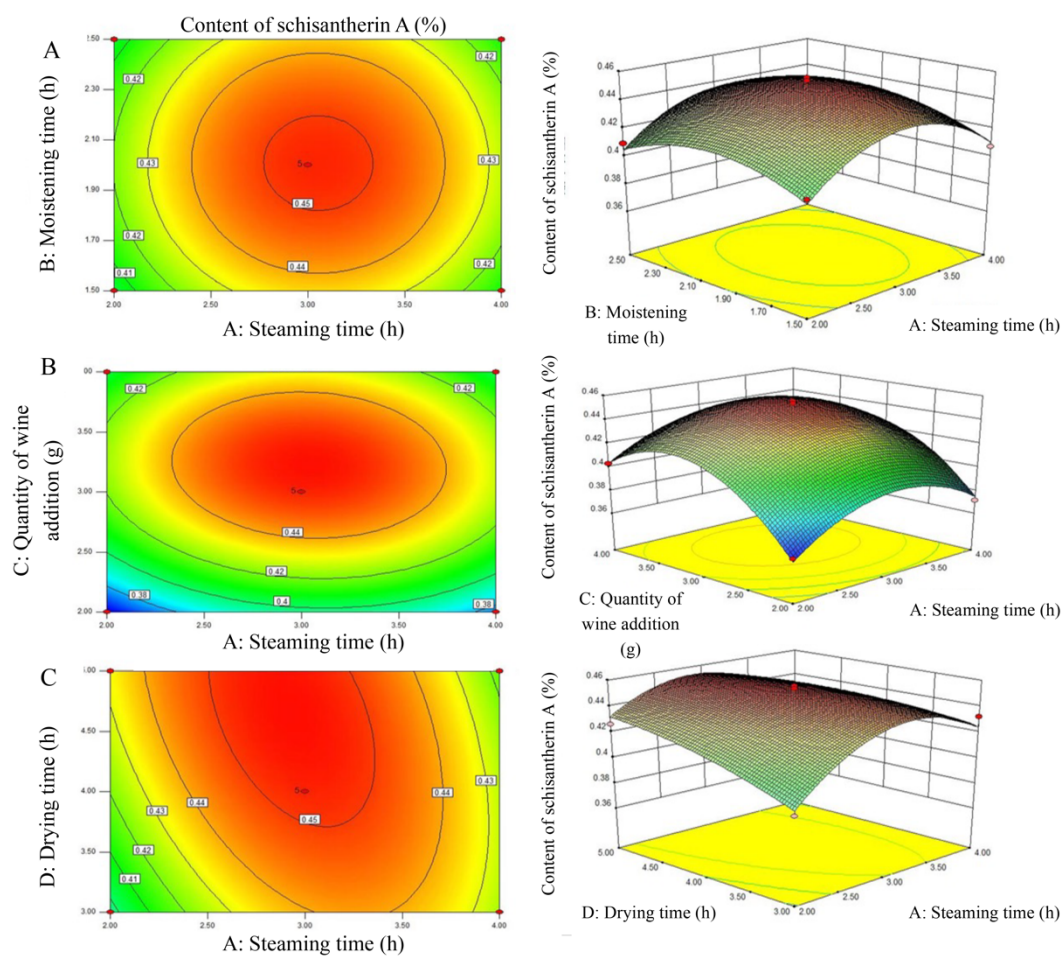

**Fig. S2.** The isogram and response surface of the interaction of each factor on the content of schisantherin A from the fruits of *S. sphenanthera*. A: steaming time and moistening time; B: steaming time and quantity of wine addition; C: steaming time and drying time.

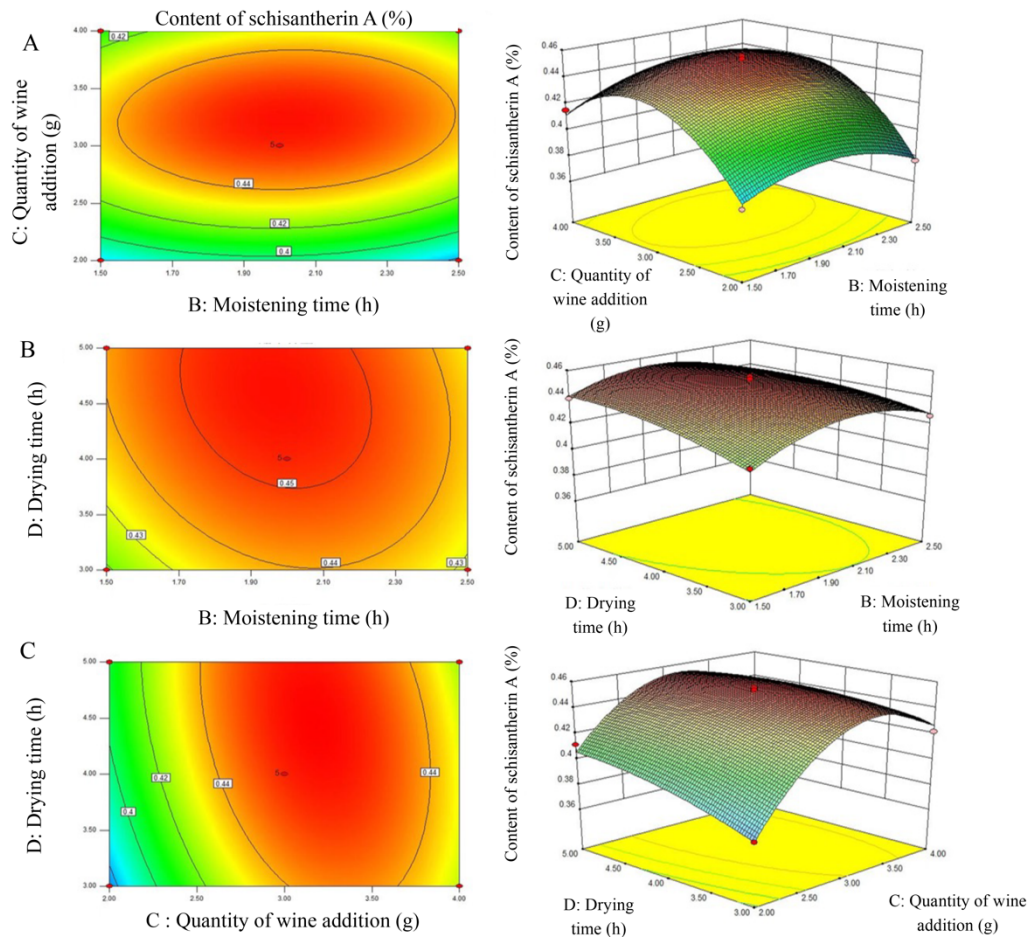

**Fig. S3.** The isogram and response surface of the interaction of each factor on the content of schisantherin A from the fruits of *S. sphenanthera*. A: moistening time and quantity of wine addition; B: moistening time and drying time; C: quantity of vinegar addition and drying time.

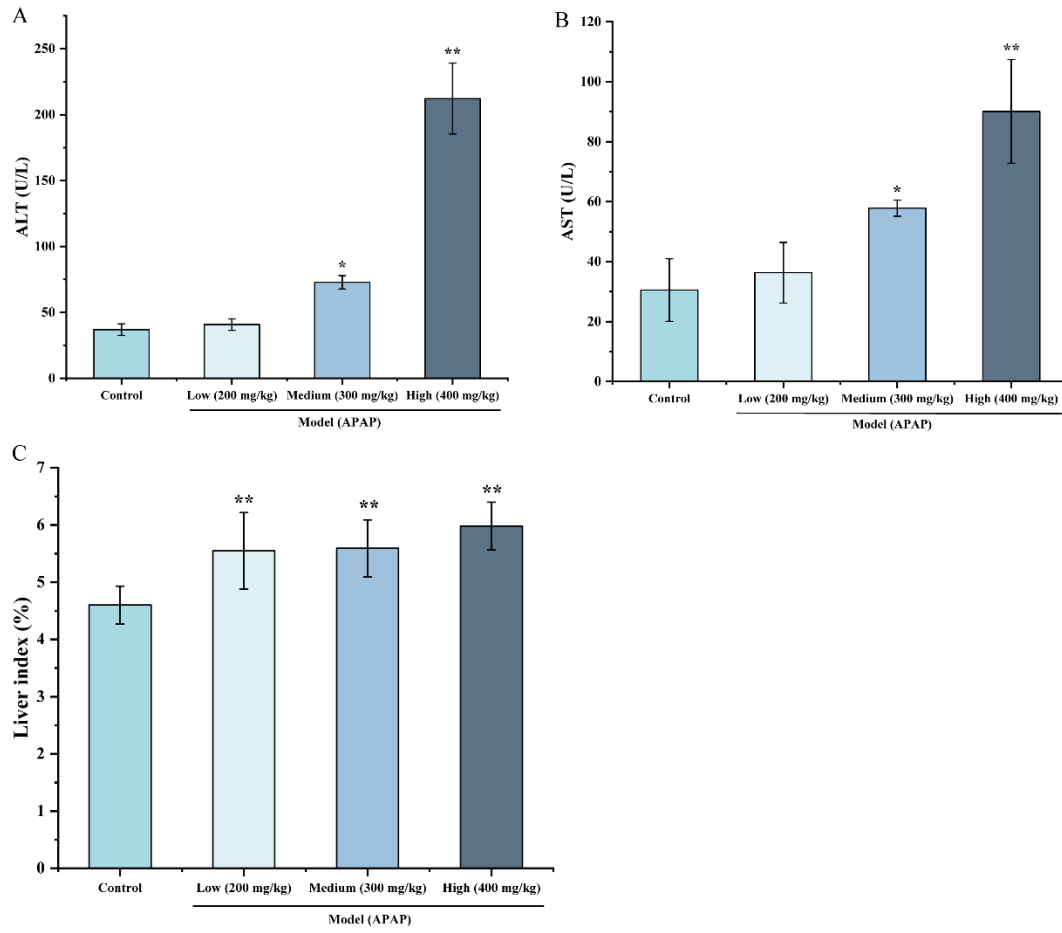

**Fig. S4.** Effect of APAP on traditional biochemical indexes in serum (A: ALT and B: AST) and liver index (C).

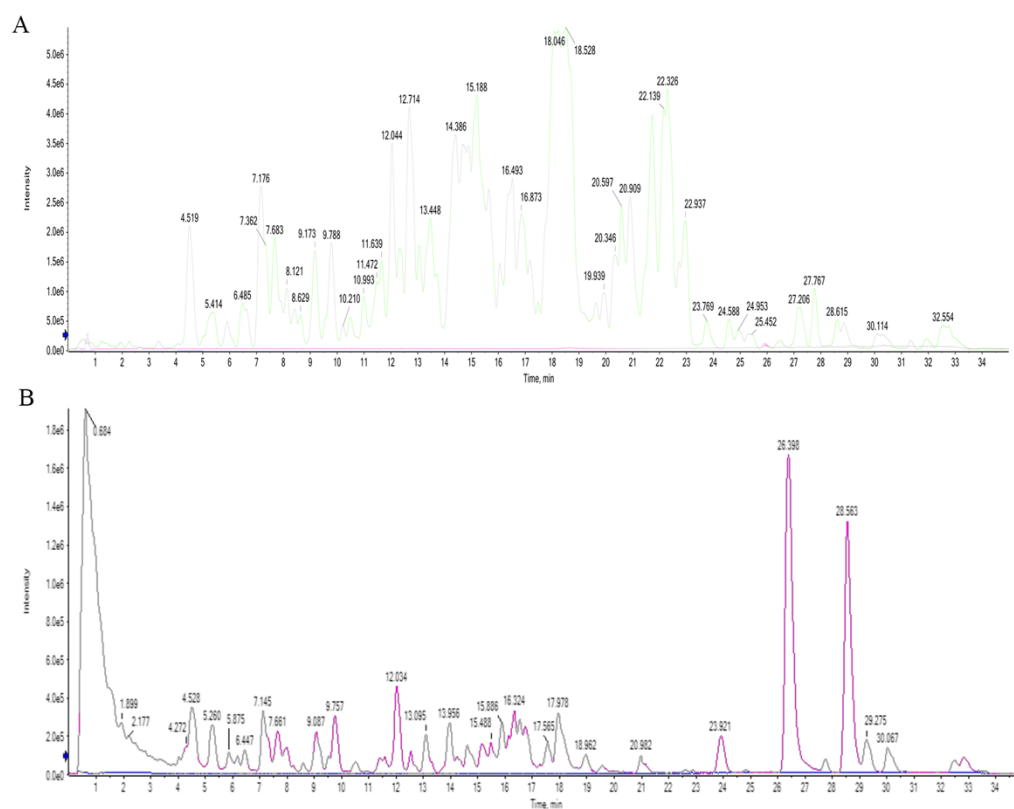

**Fig. S5.** Typical total ion flow diagram of extract of wine-steamed *S. sphenanthera* fruit (SFE) in UPLC-ESI-QTOF-MS/MS: positive ion mode (A), and negative ion mode (B).

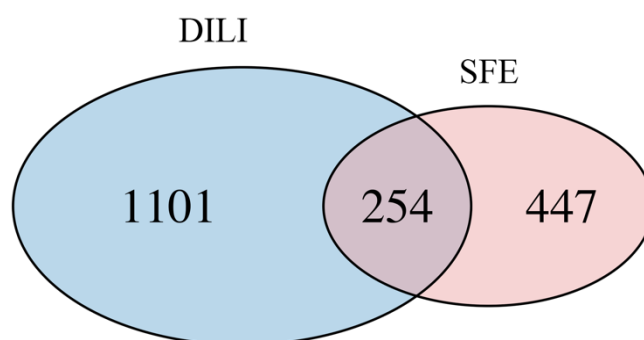

**Fig. S6.** Overlapping molecular targets between DILI and SFE bioactive compounds. DILI, drug-induced liver injury; SFE, the extract of wine-steamed *S. sphenanthera* fruit.

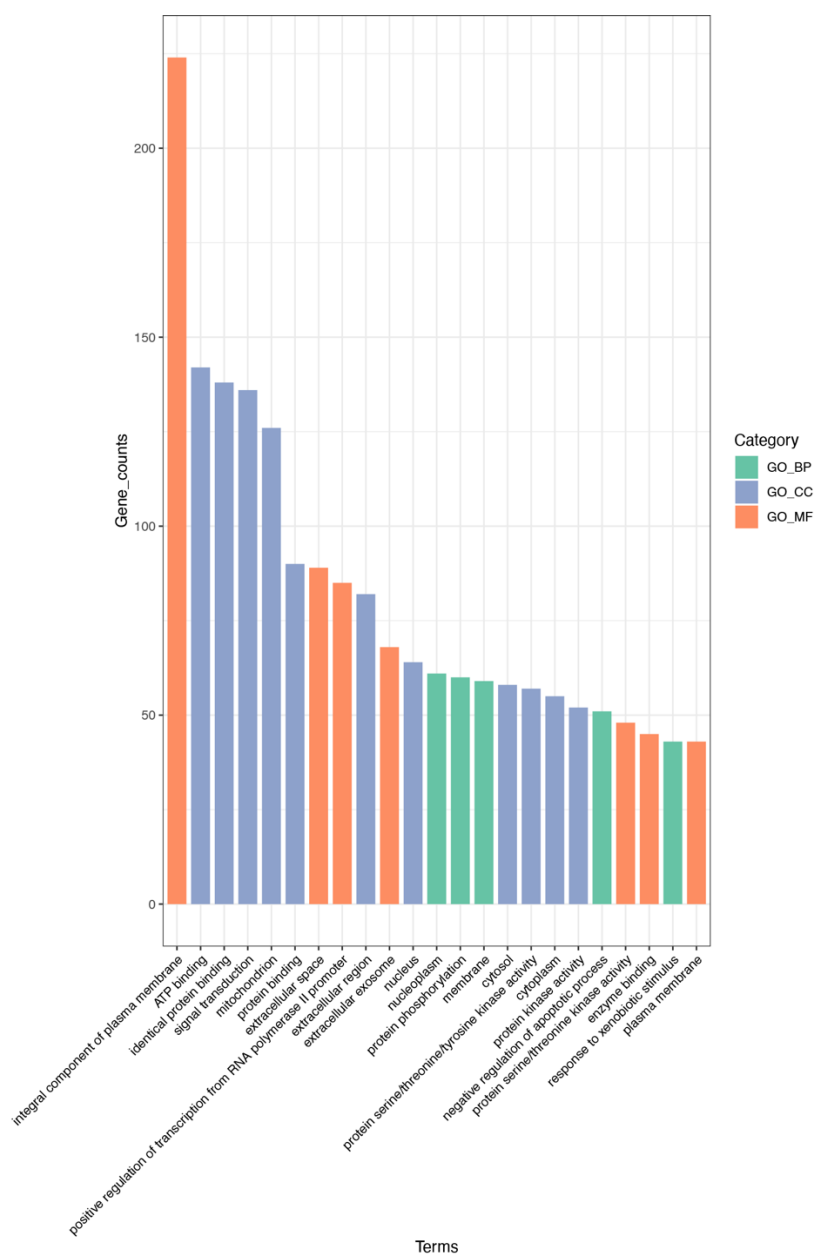

**Fig. S7.** GO enrichment analysis of SFE compounds-DILI interacting targets project.

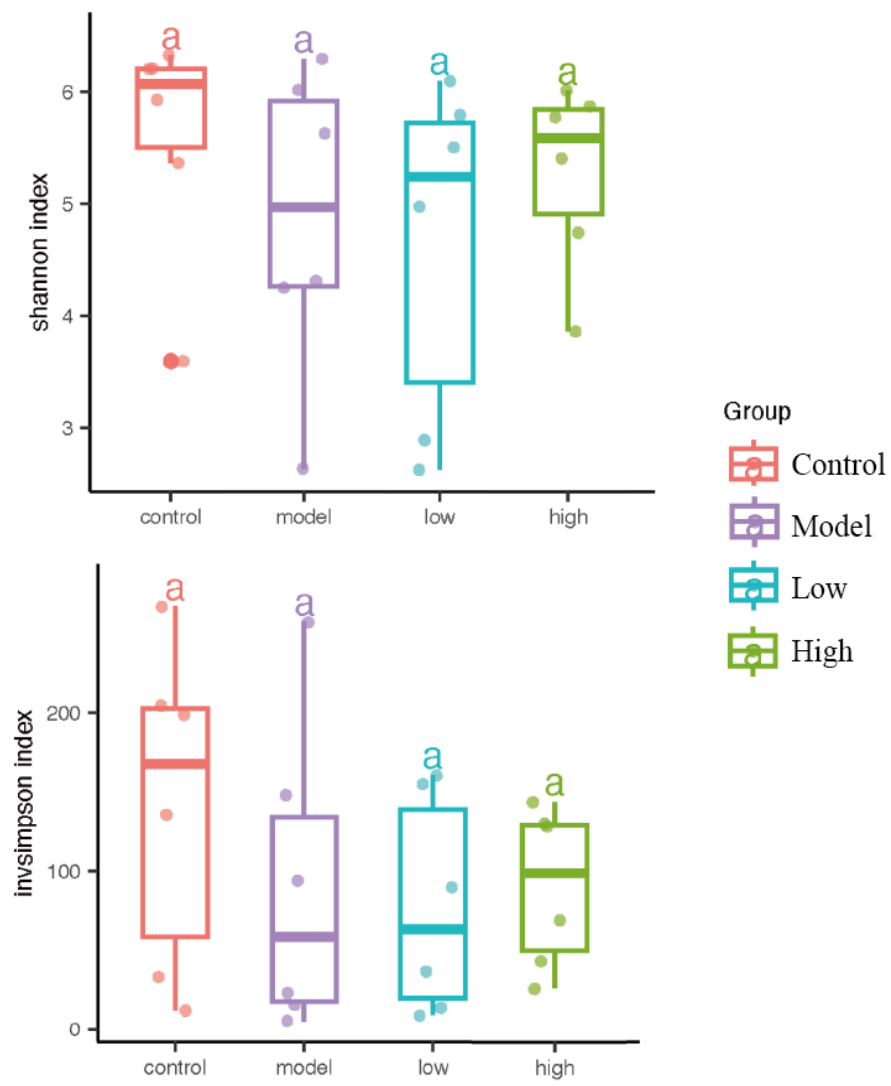

**Fig. S8.** Box plot of gut microbial alpha diversity index after SFE pretreatment.

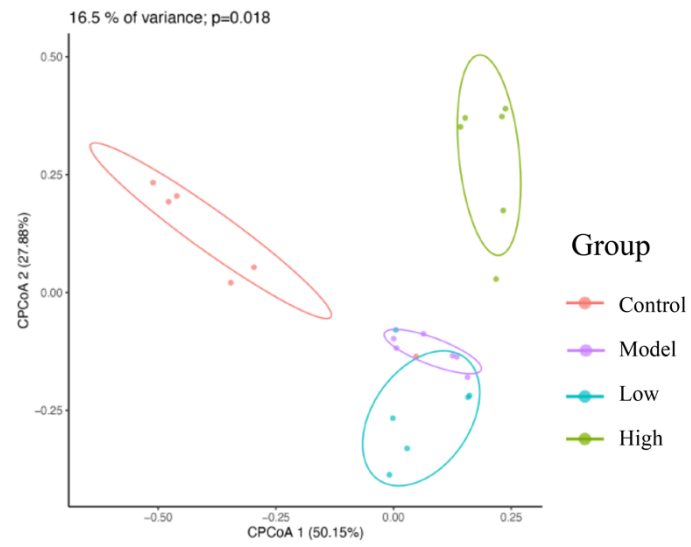

**Fig. S9.** PCoA analysis of gut microbe after SFE pretreatment based on unweighted UniFrac distance matrix.



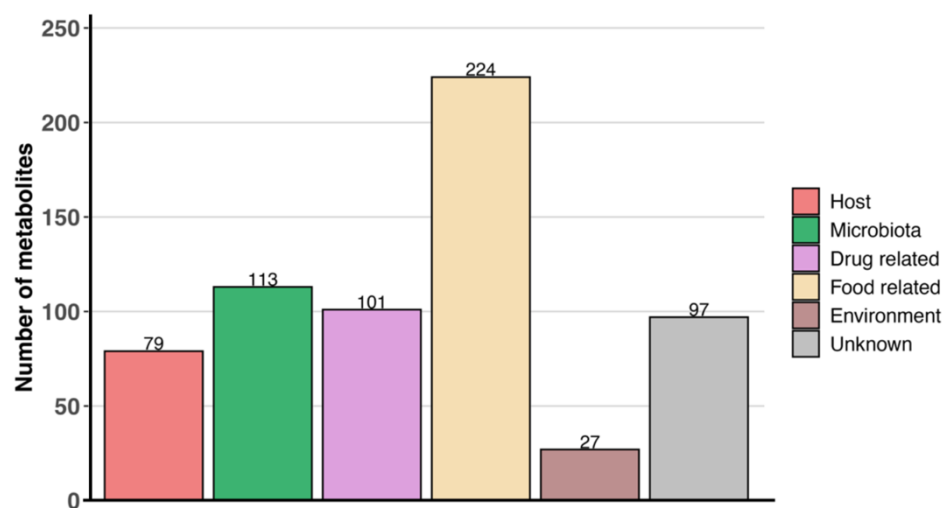

**Fig. S10.** Bar graph about the source of detected metabolites from all four groups (data combined from control, model, low-dose, and high-dose SFE groups).

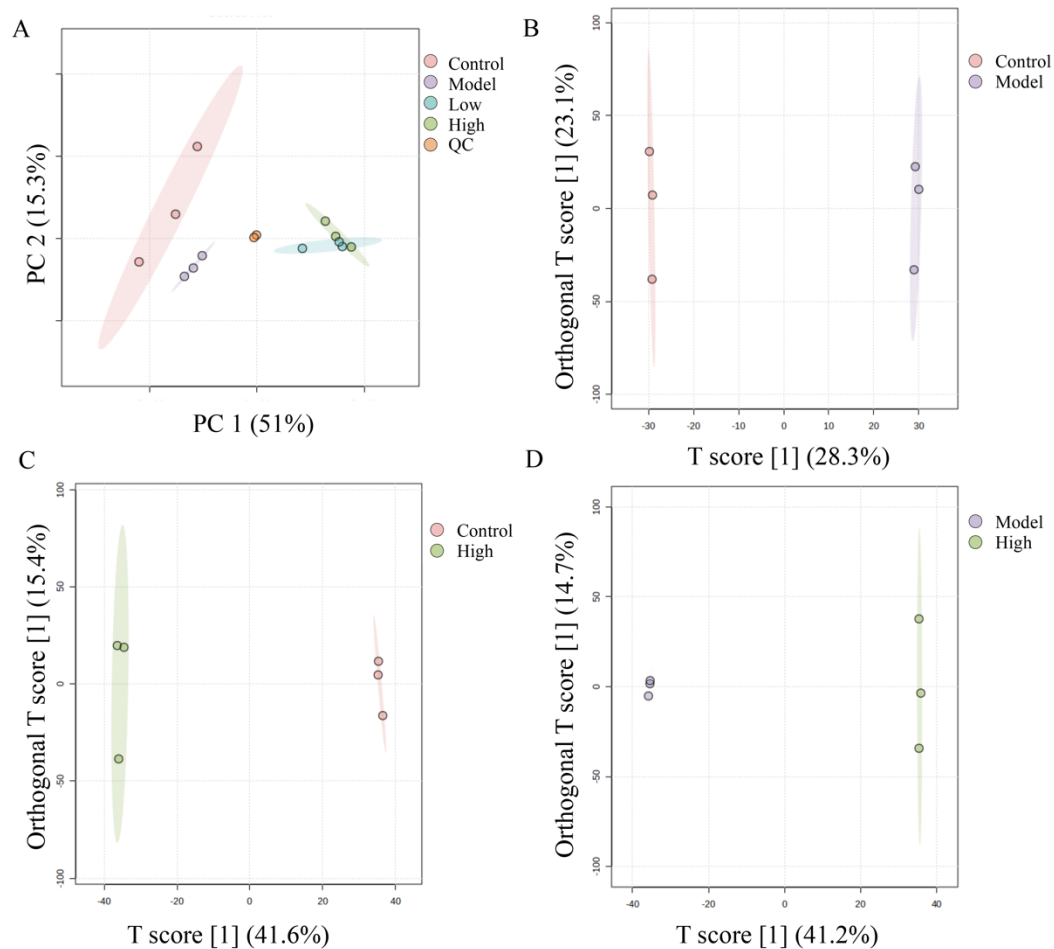

**Fig. S11.** Multivariate statistical analysis of untargeted metabolomics data in the fecal samples. PCA score plot of each sample (A), OPLS-DA analysis of three comparison groups: control vs. model (B), control vs. high (C), and model vs. high (D).
